# 1 **Protective porcine influenza virus-specific monoclonal antibodies** 2 **recognize similar haemagglutinin epitopes as humans**

3

4 Barbara Holzer<sup>1,8</sup>, Pramila Rijal<sup>2,3,8</sup>, Adam McNee<sup>1,4,8</sup>, Basu Paudyal<sup>1</sup>, Becky Clark<sup>1</sup>, Tanuja  
5 Manjegowda<sup>1</sup>, Francisco J. Salguero<sup>5</sup>, Emily Bessell<sup>1</sup>, John C. Schwartz<sup>1</sup>, Katy Moffat<sup>1</sup>, Miriam  
6 Pedrera<sup>1</sup>, Simon P. Graham<sup>1</sup>, Marie Bonnet-Di Placido<sup>1</sup>, Roberto M. La Ragione<sup>4</sup>, William  
7 Mwangi<sup>1</sup>, Peter Beverley<sup>6</sup>, John W. McCauley<sup>7</sup>, Rodney S. Daniels<sup>7</sup>, John Hammond<sup>1</sup>, Alain  
8 R. Townsend<sup>2,3</sup>, Elma Tchilian<sup>1\*</sup>

9

10 <sup>1</sup> The Pirbright Institute, Pirbright GU24 0NF, UK

11 <sup>2</sup> Centre for Translational Immunology, Chinese Academy of Medical Sciences Oxford  
12 Institute, University of Oxford, Oxford OX3 9DS, UK

13 <sup>3</sup> MRC Human Immunology Unit, MRC Weatherall Institute of Molecular Medicine, Radcliffe  
14 Department of Medicine, University of Oxford, Oxford OX3 9DS, UK

15 <sup>4</sup> Department of Pathology and Infectious Diseases, School of Veterinary Medicine,  
16 University of Surrey, Guildford GU2 7AL, UK

17 <sup>5</sup> Public Health England (PHE), Porton Down, Salisbury SP4 0JG, UK

18 <sup>6</sup> National Heart and Lung Institute, St Mary's Campus, Imperial College London W2 1PG,  
19 UK

20 <sup>7</sup> Worldwide Influenza Centre, The Francis Crick Institute, London NW1 1AT, UK

21

22 <sup>8</sup>These authors contributed equally

23 \* Corresponding author: [elma.tchilian@pirbright.ac.uk](mailto:elma.tchilian@pirbright.ac.uk)

24

25

26

27

28

29

30

31

32 **Abstract**

33 Pigs are natural hosts for the same subtypes of influenza A viruses as humans and integrally  
34 involved in virus evolution with frequent interspecies transmissions in both directions. The  
35 emergence of the 2009 pandemic H1N1 virus illustrates the importance of pigs in evolution of  
36 zoonotic strains. Here we generated pig influenza-specific monoclonal antibodies (mAbs) from  
37 H1N1pdm09 infected pigs. The mAbs recognized the same two major immunodominant  
38 haemagglutinin (HA) epitopes targeted by humans, one of which is not recognized by post-  
39 infection ferret antisera that are commonly used to monitor virus evolution. Neutralizing activity  
40 of the pig mAbs was comparable to that of potent human anti-HA mAbs. Further, prophylactic  
41 administration of a selected porcine mAb to pigs abolished lung viral load and greatly reduced  
42 lung pathology but did not eliminate nasal shedding of virus after H1N1pdm09 challenge.  
43 Hence mAbs from pigs, which target HA can significantly reduce disease severity. These  
44 results, together with the comparable sizes of pigs and humans, indicate that the pig is a  
45 valuable model for understanding how best to apply mAbs as therapy in humans and for  
46 monitoring antigenic drift of influenza viruses in humans, thereby providing information highly  
47 relevant to making influenza vaccine recommendations.

48 Pigs are natural hosts for influenza A viruses (IAV) and closely related H1N1 and H3N2 viruses  
49 circulate in pigs and humans<sup>1</sup>. Frequent interspecies transmissions between pigs and humans  
50 contributes to the evolution of IAV and can be a source for novel pandemic strains<sup>2-4</sup>. Pigs are  
51 anatomically, physiologically and immunologically more similar to humans than laboratory  
52 animals (mice, guinea pigs and ferrets) commonly used for influenza virus research<sup>5,6</sup>. Pigs  
53 and humans have similar distributions of sialic acid receptors in their respiratory tracts and  
54 longer life spans than laboratory animals which, with their more comparable size, makes them  
55 a useful stepping stone for translation of experimental results into human clinical applications.  
56 Furthermore, the dynamics of IAV transmission in pigs are well characterized and many  
57 immunologic tools, such as inbred strains, tetramers and antibodies for surface markers and  
58 cytokines are available to dissect porcine immune responses<sup>7</sup>.

59 In recent years monoclonal antibodies (mAbs) from mice and humans have been used  
60 to investigate the antigenic structure of the influenza haemagglutinin (HA) glycoprotein and  
61 mechanisms of escape from immune surveillance. Three main classes of anti-HA antibodies  
62 have been defined. The majority of most potent neutralizing mAbs are targeted to the HA head  
63 and they are subtype and clade specific<sup>8,9</sup>. A second class of HA head mAbs are broadly  
64 neutralizing within the subtype, while the third category is broadly neutralizing across HA  
65 subtypes and they mainly target the HA stem<sup>10-14</sup>. In the last decade the anti-stem mAbs have  
66 received considerable attention as a possible therapy for severe influenza disease, but so far  
67 success in small animal models has not been translated into success in the clinic<sup>15-18</sup>. We have  
68 shown that a strongly neutralizing human mAb, 2-12C, against the HA head, administered  
69 prophylactically to pigs reduced virus shedding and lung pathology after influenza challenge.  
70 Similarly, administration of DNA encoded 2-12C mAb has shown promise as a novel  
71 therapeutic strategy by reducing lung pathology in pigs<sup>19</sup>. The therapeutic administration of  
72 the human broadly neutralizing anti-stem mAb, FI6, did not reduce virus load in pigs, although  
73 it did reduce lung pathology<sup>20</sup>.

74 However, longer term investigation of human mAbs in pigs is compromised by  
75 development of anti-human Ig responses. To overcome this limitation, we developed porcine  
76 mAbs to pandemic H1N1 influenza virus which will increase the utility of the pig model in  
77 influenza virus research for evaluation of therapeutic mAbs and delivery platforms

78

## 79 **Results**

80 **Generation of porcine H1N1pdm09-specific mAbs.** To generate a high frequency of  
81 antibody secreting cells, two pigs were challenged intranasally with a swine H1N1 isolate,  
82 derived from the A(H1N1)pdm09 virus (H1N1pdm09) and re-challenged 22 days post infection  
83 (DPI) with the same virus. Both pigs shed virus after the first challenge, confirming successful

84 influenza infection, but shedding was not detected after the second challenge (**Fig. 1a**). Serum  
85 neutralizing antibody titres to H1N1pdm09 and binding to HA from A/England/195/2009 (pHA)  
86 were determined at 7, 14, 22 and 29 DPI, showing that both pigs developed strong antibody  
87 responses with neutralizing titer of 1:640 (**Figs. 1b and c**). Analysis by *ex vivo* B cell ELISpot  
88 revealed that the number of HA-specific IgG-secreting cells in the blood was low compared to  
89 tracheobronchial lymph nodes (TBLN), while lung, tonsil and broncho-alveolar lavage (BAL)  
90 tissues had intermediate levels (**Fig. 1d**). Therefore, we used TBLN from pig 12 at day 7 post  
91 re-challenge, to sort HA-specific B cells using biotinylated pHA. The gating strategy is shown  
92 in **Supp Fig 1**.

93 A total of 70 single cells were sorted and 45 were positive for the heavy and light chains  
94 of IgG (63% recovery). cDNA was synthesized followed by a nested PCR amplification to  
95 generate gamma and kappa chains for cloning, and a single PCR step for the production and  
96 cloning of the lambda chains. PCR products were cloned into porcine expression cassettes  
97 containing constant domains of the kappa, lambda and gamma chains. All amplified gamma  
98 heavy chains were IgG1.

99 Of the 45 antibody pairs 19 had a lambda light chain and 26 had kappa light chains  
100 (**Table 1**). The germline light chain V gene segments are well annotated for the pig but are  
101 polymorphic. Therefore it is difficult to distinguish between closely related gene segments due  
102 to V(D)J recombination yielding imprecise junctions and the presence of somatically  
103 hypermutated clones<sup>21-24</sup>. Presumably because of these processes, none of the light chains  
104 were identical and were solely classified by subfamily (e.g. IGKV1, IGKV2, IGLV3, and IGLV8).  
105 The porcine IGH region is incompletely annotated, polymorphic, and the genes tend to be  
106 highly similar (same subfamily) outside the CDRs and often share CDRs between genes and  
107 alleles<sup>25,26</sup>. It is therefore difficult to determine IGHV gene segment usage (**Table 1**).

108 Each native pair of light and heavy chain expressing plasmids was transiently  
109 transfected into HEK293 cells to produce recombinant porcine mAbs and the IgGs were  
110 purified from culture-supernatants. All 45 mAbs expressed and 40 bound to pHA.

111

112 **Neutralizing and binding activity of porcine influenza mAbs.** Of the 40 mAbs binding pHA  
113 in ELISA, nine strongly neutralized H1N1pdm09. The mean concentration giving 50%  
114 inhibition was 12.2 ng/ml (range 2.5 to 20 ng/ml) which is comparable to the strongly  
115 neutralizing human mAb 2-12C (20 ng/ml)<sup>19,27</sup>. Among other mAbs pb11 inhibited at 80 ng/ml  
116 and clones pb3, pb10, pb13, pb19, pb39, pb43 and pb45 at greater than 5 µg/ml (**Fig. 2a and**  
117 **Table 1**). mAb pb29 inhibited at ~41 µg/ml. The mAbs had a similar pattern of  
118 hemagglutination inhibition (HAI) to their neutralization (**Fig. 2b and Table 1**).

119 We also tested the binding of the mAbs to MDCK-SIAT1 cells stably expressing pHA.  
120 The binding strength correlated positively with the neutralization potency. The 9 strongly  
121 neutralizing mAbs show saturation binding in the range of 0.3 to 0.6  $\mu\text{g/ml}$ , while pb11  
122 saturated at a slightly higher concentration of 1.25  $\mu\text{g/ml}$ . The poorly neutralizing pb3, pb10,  
123 pb13, pb19, pb29, pb39, pb43 and pb45 saturate at higher concentrations of 6.2 to 12.5  $\mu\text{g/ml}$   
124 (**Fig. 2c**). The rest of the non-neutralizing mAbs showed weak or no binding to the cells at  
125 very high concentrations despite all of them being positive in ELISA. This may be due to the  
126 native HA on the cell surface as opposed to the secreted protein. Antibody pb29 also bound  
127 to MDCK cells expressing HAs from A/Vietnam/1203/2004 (A(H5N1)) and PR8 (A(H1N1))  
128 viruses (**Fig. 2d**). There was no correlation between IGHV, IGKV, or IGLV gene usage or  
129 CDR-H3 length with neutralization or binding.

130 We analyzed the inhibition of binding of the human anti-head mAbs 2-12C and T3-4B,  
131 and the anti-stem mAb MEDI8852 to MDCK-SIAT1-pHA by the porcine mAbs <sup>27</sup>. Only the  
132 porcine mAbs pb1, pb14, pb15, pb18, pb20, pb24 and pb27 blocked binding of the anti-head  
133 mAbs and these pig mAbs are therefore considered to bind to HA head (**Fig. 3a**). These  
134 antibodies also inhibited hemagglutination (**Fig. 3b**). However, it is difficult to allocate them to  
135 a specific epitope within the head because of the steric hindrance by IgG. In contrast, pb29  
136 blocked binding of MEDI8852, did not inhibit hemagglutination and was cross-reactive with  
137 HAs of other H1 and H5 subtypes (**Fig. 2d**), indicating that this might be a stem-specific mAb.  
138

139 **HA epitope recognition.** We tried to define the HA sites recognised by the mAbs by analyzing  
140 the neutralization of a H1N1pdm09 vaccine virus X-179A (with HA and NA of  
141 A/California/07/2009 virus) containing a K163Q HA1 amino acid substitution. This lies in the  
142 Sa antigenic site of the pHA and is the defining substitution of antigenically drifted clade 6B  
143 human influenza viruses that spread globally in 2014<sup>27</sup>. Antibodies pb1, pb14, pb15, pb24,  
144 pb27 and the human 2-12C all neutralized K163Q variant virus with 50% inhibition at  
145 concentrations between 10 and 40 ng/ml. pb20 required a higher concentration of 320 ng/ml  
146 for neutralization (**Fig. 3b**). mAbs pb16, pb18 and the control human mAb T2-6A did not  
147 neutralize virus with the K163Q substitution. However, pb16, pb18 and pb20 neutralized virus  
148 with a HA1 K130E substitution at 10 to 15 ng/ml, while pb1, pb14, pb15, pb24 and 2-12C did  
149 not.

150 To identify the site recognised by mAbs pb1, pb15, pb18, pb20, pb24 and pb27 we  
151 selected escape mutants of the X-179A virus. Gene sequencing was performed on escape  
152 mutant populations, not single clones, hence substitutions in multiple sites in the HA head  
153 were observed but no accompanying substitutions in the NA were found. Antibodies pb1,  
154 pb15, pb24 and pb27 are classified to be of one group where they selected one or more

155 substitutions in the Ca site (K130E, Q223R), the Sa site (G155E) and the Sb site (D187E)  
156 (**Fig. 4**). These substitutions surround the sialic acid binding site but not all are necessarily  
157 key substitutions that alter virus antigenicity; G155E and Q223R are often selected as cell  
158 culture- or egg-propagation adaptations. The escape mutants were either not neutralized or  
159 required higher concentrations of mAbs to neutralize. The key antigenic substitution, K130E,  
160 was selected by pb15 and pb27, as it was by the human mAb 2-12C<sup>27</sup>. Two other mAbs, pb18  
161 and pb20, selected substitutions in the Sa site (K160E) and the Sb site (A186D) and did not  
162 neutralize the K163Q X-179A virus, making them similar to the previously described human  
163 Sa site mAbs T3-4B and T2-6A<sup>27</sup>.

164 Amino acid substitutions at these HA positions have contributed to the antigenic drift  
165 of human H1N1pdm09 viruses. Among viruses circulating in 2019-2020, 18% have  
166 substitution at K130. While A186 is substituted at a low frequency its neighboring residue,  
167 D187, is substituted in 34% of recent viruses. Further, K160M substitution has been found in  
168 3% - 8% of the viruses detected mostly in North America, South America and Australia<sup>27</sup>.

169 Overall, these results show that nearly a quarter of the porcine mAbs neutralized  
170 strongly the H1N1pdm09 virus. The strongly neutralizing mAbs also bind well to MDCK-SIAT1  
171 cells expressing native pHA. In contrast, the remainder of the mAbs bound to recombinant  
172 pHA protein in ELISA but showed weak or no binding to the MDCK-pHA cells. Among the high  
173 binding and strongly neutralizing mAbs there appear to be two types of porcine mAbs  
174 recognizing the two major antigenic sites in pHA: the K163 site (T3-4B or T2-6A like) and the  
175 K130 site (2-12C like).

176

177 ***In vivo* effect of porcine mAbs.** To determine whether porcine mAbs were protective *in vivo*,  
178 we administered 10 mg/kg and 1 mg/kg of pb27 intravenously along with a non-treated control  
179 group. Unfortunately, two control animals were culled before the start of the experiment for  
180 reasons unrelated to the experiment, leaving only three controls. Twenty-four hours later the  
181 pigs were challenged with H1N1pdm09 and 4 days later culled to assess virus load and  
182 pathology (**Fig. 5a**). The total virus load in nasal swabs was assessed daily over the 4 days.  
183 In animals treated with 10 mg/kg the virus load was significantly lower as determined by the  
184 area under the curve (AUC) compared to untreated control animals ( $p=0.037$ ). At day 1, the  
185 difference was also significant ( $p=0.02$ ) but not on the other days, although there were two  
186 pigs out of 5 that did not shed virus at all (**Fig. 5b**). No virus was detected in the BAL and lung  
187 in the 10 mg/kg group at 4 DPI. The effect of 10 mg/kg of pb27 is slightly less than the effect  
188 of administration of 15 mg/kg of human 2-12C mAb, which we have previously shown in a  
189 similar prophylactic experiment<sup>19</sup>. The lower dose (1 mg/kg) of pb27 did not have a statistically  
190 significant effect on virus load in nasal swabs or BAL, but no virus was detected in the lung  
191 accessory lobe.

192 Gross pathology was reduced in both pb27 treated groups, but this was only significant  
193 in the 10 mg/kg group ( $p = 0.003$ ) (**Fig. 6a**). Histopathological evaluation showed typical  
194 changes associated with influenza virus infection in the control group, including airway  
195 epithelial cell necrosis and attenuation, inflammatory cell infiltration within the airways, alveolar  
196 luminae and septae, and perivascular/peribronchiolar lymphoplasmacytic cuffing (**Fig. 6b**).  
197 Many bronchiolar and bronchial epithelial cells exhibited positive staining for influenza  
198 nucleoprotein (NP). In animals treated with 1 mg/kg, only minimal to mild histopathological  
199 changes were observed in 3 of 5 animals, with only a few scattered NP-positive cells within  
200 the airway epithelium in 1 of 5 animals from the group. Animals treated with 10 mg/kg showed  
201 neither histopathological changes nor NP-stained cells. Two scoring systems used to evaluate  
202 the histopathology and compare groups showed significant reduction of histopathology  
203 between the 10 mg/kg and the control group ( $p= 0.0045$  for both Morgan and Iowa scores)<sup>28,29</sup>.

204 The concentration of pb27 in porcine serum was determined daily after challenge. A  
205 peak concentration of 265  $\mu\text{g/ml}$  pb27 was detected in the 10 mg/kg group and 15  $\mu\text{g/ml}$  in  
206 the 1 mg/kg group 24 hours after administration. This declined in both groups over the next 3  
207 days to 65  $\mu\text{g/ml}$  and 7  $\mu\text{g/ml}$ , respectively (**Fig. 7a**). In BAL, pHA-specific antibodies were  
208 detected in the pb27 treated groups (mean of 106.5 ng/ml for the 10 mg/kg and 22.4 ng/ml for  
209 the 1mg/kg pb27 groups). Neutralizing activity in serum was detected in both 10 mg/kg and 1  
210 mg/kg groups (**Fig. 7b**). There was a 50% inhibition titer of 1:19,200 for the 10 mg/kg group  
211 and 1:1,280 for the 1 mg/kg group at the time of challenge. Neutralizing activity in BAL at 1:104  
212 was seen only in the 10 mg/kg group, but the lavage procedure greatly dilutes the fluid present  
213 in the airways, although the dilution factor is difficult to calculate.

214 Overall, these results indicate that pb27 offers robust protection at 10 mg/kg and this  
215 correlates with mAb concentration and neutralization activity in serum. Administration of pb27  
216 at 1 mg/kg reduced virus load in the lungs, but not in nasal swabs or BAL. There was a trend  
217 towards reduced gross histopathology at 1 mg/kg.

## 218 219 **Discussion:**

220 For the first time we have generated porcine influenza specific mAbs from the lung draining  
221 lymph nodes of H1N1pdm09 infected pigs. The antibodies are mainly against the HA head  
222 and directed towards two major immunodominant epitopes – the Sa site (residues 160 and  
223 163) and Ca site (residue 130), also recognized by humans. The neutralizing activity of these  
224 pig mAbs is comparable to the strongest human mAbs. The selected mAb, pb27, reduced  
225 virus load and pathology after administration at 10 mg/kg, which resulted in a sustained serum  
226 concentration of 100  $\mu\text{g/ml}$  with approximately three logs less in BAL. Lung and BAL virus load

227 was abolished and lung pathology eliminated by 10 mg/kg dosage. Nasal shedding although  
228 reduced was not eliminated.

229 Although pig mAbs against porcine epidemic diarrhoea, classical swine fever and  
230 porcine reproductive and respiratory syndrome viruses have been recently generated, here  
231 we show that pig mAbs could be produced with high efficiency using draining lymph nodes  
232 rather than blood<sup>30-32</sup>. We detected a very low frequency of HA specific B cells in the blood,  
233 but a much higher frequency in the local lung tissues and tonsils. Access to draining nodes  
234 (by needle biopsy), tonsils and BAL is certainly possible in humans or other large animals and  
235 may increase the efficiency of generating mAbs against a variety of disease agents.

236 The repertoire of IGLV and IGKV gene segments of our mAbs has, as expected for  
237 pigs, no apparent usage bias<sup>21,22</sup>. It is interesting to note that the longest IGH chains tend to  
238 pair with IGL; whereas the shortest IGH chains tend to pair with IGK. Also, the IGL chains tend  
239 to pair with IGH chains containing a double Cys (so probably a disulphide bond) in the CDRH3.  
240 From an evolutionary standpoint, it is interesting to note that cattle almost exclusively use IGL  
241 and have longer than usual CDRH3s rich in cysteines<sup>33,34</sup>. However, relatively few clones were  
242 analysed in the present study (n = 45) and future work is necessary to determine whether this  
243 phenomenon remains true for a larger number of clones across the entire porcine repertoire.

244 We have shown that a strongly neutralizing monoclonal antibody 2-12C against the  
245 HA head administered prophylactically (at 15 mg/kg) to pigs reduced virus load and lung  
246 pathology after H1N1pdm09 influenza challenge in a short term experiment<sup>19</sup>. However, longer  
247 therapeutic experiments encounter the problem of anti-human antibody responses. Use of pig  
248 mAbs will circumvent this difficulty. Although we have not yet measured the pharmacokinetic  
249 properties of the porcine mAbs, their availability will allow investigation of how to use mAbs  
250 optimally to prevent or treat disease. It is interesting that pb27, a porcine IgG1 mAb, did not  
251 abolish virus shedding in nasal swabs. It may be that a different IgG subclass or local  
252 administration to the respiratory tract would be more effective in suppressing nasal shedding.  
253 In our experiment pb27 was given 24h before virus challenge, while in humans mAbs will  
254 probably be given post-infection. Further experiments will be needed to determine the efficacy  
255 of mAb therapy after infection in the porcine model. The pig influenza model could also be  
256 used to evaluate antibody delivery platforms, the effect of IgA and different IgG subclasses  
257 and the role of Fc mediated functions. The therapeutic effect of anti-stem and anti-head mAbs  
258 and the synergistic effect of cocktail administration could be compared as well.

259 The specificity of the pig mAbs is very similar to human mAbs known to target  
260 H1N1pdm09 HA. They recognised the two major Sa (residues 160 and 163) and Ca (residue  
261 130) sites. In 2014, H1N1pdm09 viruses acquired antigenic drift by substitution at position  
262 K163. However, ferret antisera used for monitoring of the viruses failed to detect this antigenic  
263 change<sup>27,35,36</sup>. Overall, our results indicate that the pig is an excellent model for understanding



264 how best to apply mAbs as therapy in humans and, since pigs appear to make an antibody  
265 response similar to that of humans, pig antisera might be a better surrogate than ferret antisera  
266 to detect influenza antigenic drift and thereby inform vaccine recommendations for humans.

267

## 268 **Material and Methods**

269 **Monoclonal antibodies:** The pb27 mAb was produced in bulk by Absolute Antibody Ltd  
270 (Redcar, UK) and dissolved in 25mM Histidine, 150 mM NaCl, 0.02% Tween, pH6.0 diluent.  
271 1mg each of a further twenty mAbs (pb1, pb5, pb8, pb9, pb11, pb14, pb15, pb16, pb17, pb18,  
272 pb20, pb21, pb24, pb27, pb29, pb39, pb31, pb37, pb45, pb46) was also produced by Absolute  
273 Antibody Ltd and used in serological assays. The human anti-influenza 2-12C, T2-6A, T3-4B  
274 and MEDI8852 mAbs were kindly provided by Alain Townsend.

275

276 **Animal studies.** The animal experiments were approved by the ethical review processes at  
277 the Pirbright Institute (TPI) and the Animal and Plant Health Agency (APHA) and conducted  
278 according to the UK Government Animal (Scientific Procedures) Act 1986 under project  
279 licence P47CE0FF2. Both Institutes conform to the ARRIVE guidelines.

280 *H1N1pdm09 challenge for generation of mAbs.* Two 5-to-6 weeks old Landrace x Hampshire  
281 cross, female pigs were obtained from a commercial high health status herd and were  
282 screened for absence of influenza A infection by matrix gene real time RT-PCR and for  
283 antibody-free status by HI using four swine influenza virus antigens - H1N1pdm09, H1N2,  
284 H3N2 and avian-like H1N1. Pigs were challenged intra-nasally with  $1.5 \times 10^7$  PFU of MDCK  
285 grown swine A(H1N1)pdm09 isolate, A/swine/England/1353/2009, derived from the 2009  
286 pandemic virus, swine clade 1A.3. (H1N1pdm09) in a total of 4 ml (2 ml per nostril) using a  
287 mucosal atomisation device MAD300 (MAD, Wolfe-Tory Medical). Twenty-two days post  
288 infection (DPI) the two pigs (pigs 12 and 13) were re-challenged intranasally with  $2 \times 10^7$  PFU  
289 H1N1pdm09. Animals were humanely euthanized 7 days post re-challenge (day 29 post  
290 primary challenge) with an overdose of pentobarbital sodium anaesthetic.

291

292 *In vivo efficacy of pb27.* Fifteen 5 weeks old Landrace x Hampshire cross, female pigs were  
293 obtained from a commercial high health status herd and were screened for absence of  
294 influenza A infection and influenza-specific antibody-free status as above. Pigs weighed  
295 between 14.5 and 18 kg (average 16.3kg). Pigs were randomized into three groups of five  
296 animals as follows: the first group received 10 mg/kg pb27 intravenously via the ear vein after  
297 sedation; the second 1 mg/kg pb27 intravenously and the third remained untreated. Two pigs  
298 reached their humane end points before the start of the experiment for reasons unrelated to  
299 the experiment, leaving only three controls. Twenty-four hours after mAb administration all  
300 animals were challenged intranasally with  $8 \times 10^6$  PFU of H1N1pdm09 in 4 ml (2ml per nostril)

301 using a mucosal atomization device MAD300. Clinical signs (temperature, state of breathing,  
302 coughing, nasal discharge, appetite, altered behaviour) observed were mild and none of the  
303 pigs developed moderate or severe disease.

304

305 **Pathological and histopathological examination of lungs.** Animals were humanely  
306 euthanized at four DPI with an overdose of pentobarbital sodium anaesthetic. The gross and  
307 histopathological analyses was performed as previously described<sup>29,37</sup>. Briefly, lungs were  
308 removed and digital images were taken of the dorsal and ventral aspects. Gross pathology  
309 was scored as previously described<sup>38</sup> and the lung surface with lesions was calculated by  
310 digital image analysis using Nikon NIS-Ar software. Lung tissue samples were taken from the  
311 apical, medial and diaphragmatic lobes and fixed in 10% buffered formalin. Four micron  
312 sections were cut and stained with H&E for histopathological analysis and with IHC using a  
313 mouse mAb against the virus nucleoprotein (NP)<sup>37</sup>. Histopathological lesions were scored by  
314 a qualified veterinary pathologist following two systems previously described<sup>28,29</sup>.

315

316 **Tissue Sample Processing.** Two nasal swabs (one per nostril) were taken daily following  
317 infection with H1N1pdm09. Tonsil, mesenteric, tracheobronchial (TBLN) and mandibular  
318 lymph nodes were dissected out, cut into smaller pieces and tissue integrity disrupted by  
319 squashing them with the back of a plunger in the presence of RPMI supplemented with 10%  
320 FBS. The tissue homogenates were passed through 100 µm cell strainers (Sigma, UK). Blood,  
321 spleen, broncho-alveolar lavage (BAL) and accessory lung lobe were processed as described  
322 previously<sup>29,37</sup>. Virus titer in nasal swabs, BAL and lung was determined by plaque assay on  
323 MDCK cells as previously described<sup>29</sup>.

324

325 **Single cell sorting.** Cryopreserved single cell suspensions from the TBLN were thawed and  
326 rested for 1 to 2h at room temperature before staining for surface markers and HA binding.  
327 For the single cell sort  $1.4 \times 10^7$  cells from pig 12 were stained with CD3-RPE (Clone: PPT3,  
328 BIO-RAD, UK), CD8α-RPE (Clone: MIL12, BIO-RAD, UK), CD172α-RPE (Clone: 74-22-15,  
329 BIO-RAD, UK) and 50 µg/ml biotinylated, trimeric H1N1pdm09 (A/England/195/2009) HA  
330 (pHA) for 30 min at 4°C in the dark. After the incubation step, cells were washed with PBS  
331 twice before staining with the following antibodies or reagents for another 30 min at 4°C in the  
332 dark: Streptavidin-BV650 (Biolegend, UK), IgG (H+L) AF 647 (Mouse anti-pig IgG (H+L) AF  
333 647, Generon, UK) and near-IR fixable Live/Dead stain (Invitrogen, UK). After the final  
334 labelling steps, the cells were washed 3 times in PBS and then re-suspended in 0.5 ml of pre-  
335 chilled 0.5% BSA PBS and passed through a 70 µm cell strainer (BD Biosciences, UK) prior  
336 to cell sorting. Single colour controls were used for compensation and fluorescence minus one  
337 primary Ab controls were used to set thresholds.

338 pHA-specific B cells were identified and collected, using DIVA 8 acquisition software  
339 and a FACS Aria III cell sorter (BD Biosciences), at single cell density into hard shell 96-well  
340 PCR plates (BIORAD, UK) containing 10 µl/well of RNA catch buffer (10mM Tris pH7.4  
341 supplemented with RNasin (Promega, UK)). Full 96 well plates were immediately covered with  
342 aluminium foil seals, centrifuged for 5 min at 300g, 4°C and transferred to -80°C. The FACS  
343 gating strategy to identify HA positive, single B cells is shown in **Suppl Fig 1**. In brief, samples  
344 were gated on lymphocytes (SSC-A vs FSC-A) and singlet (FSC-H vs FSC-A) live cells were  
345 identified by a live/dead stain. HA-specific IgG<sup>Hi</sup> cells were then determined as CD3<sup>-</sup>, CD8α<sup>-</sup>,  
346 CD172α<sup>-</sup> and double positive for HA and IgG.

347

348 **Cloning of light and heavy chains from single cells.** We used a two-step RT-PCR method  
349 to amplify the variable genes of the heavy and light chains. cDNA was synthesized in one  
350 reaction and aliquots of the cDNA were used in subsequent PCRs to amplify VDJ heavy or VJ  
351 light genes in separate reactions. cDNA synthesis on single, sorted cells was carried out in a  
352 total reaction volume of 20 µl using Sensiscript reverse transcriptase (Qiagen, UK) containing  
353 a mix of oligonucleotides dT<sub>23</sub>VN (NEB, UK) and random hexamer primers (NEB, UK). The  
354 cDNA reaction was incubated for 60 min at 40°C. Two to 4µl of cDNA was used to amplify the  
355 heavy and light chains respectively. For amplification of the heavy and kappa chains a nested  
356 PCR approach was chosen to have enough material for the downstream cloning whereas for  
357 the lambda chain one PCR yielded enough of the PCR product for the subsequent cloning  
358 step. For all PCRs, the Q5 High-Fidelity 2x Master Mix (NEB, UK) was used according to the  
359 manufacturer's instructions in a total reaction volume of 40 µl. The following oligonucleotide  
360 primers were used for the first PCR of the heavy chains IGHV\_L1\_F, IGHV\_L2\_F and  
361 IGHG\_191R (see supplementary table 1) which amplify all IgG subtypes. The products of the  
362 PCR were analysed on a 1% agarose/1xTAE gel. If there was only one specific product, the  
363 PCR product was purified with the GFX PCR DNA and Gel Band Purification Kit (GE  
364 Healthcare, UK) and eluted in dH<sub>2</sub>O. In case of multiple products, the right sized product was  
365 extracted, purified and eluted in dH<sub>2</sub>O.

366 Up to 20 ng of DNA was used as template for the second PCR with subtype-specific  
367 reverse primers (IgG1\_R\_HiFi or IgG3\_R\_HiFi) and the IgG forward oligo, IgG\_F\_HiFi that  
368 binds in the conserved FR1 of the V gene of IGH (**Suppl Table 1**).

369 The second PCR product (V, D, J heavy genes) was cloned in frame by HiFi assembly  
370 (NEB, UK) into the *KpnI/PstI* (NEB, UK)-linearized expression vector containing the IgG1  
371 constant domain. The kappa VJ region was also amplified with a nested PCR approach using  
372 IgK\_L1\_F, IgK\_L2\_F and IgK\_R primers in the first PCR reaction. The PCR products were

373 either gel extracted or directly purified and used as the template for the second PCR with  
374 primers IgK\_V1\_F\_HiFi IgK\_V2\_F\_HiFi and IgK\_R\_HiFi. The products from the second PCR  
375 were cloned into the kappa expression vector.

376 Amplification of the lambda chain was successfully achieved in one 40  $\mu$ l PCR reaction  
377 using IgL\_V3\_F\_HiFi, IgL\_V8\_F\_HiFi and IgL\_R\_HiFi primers (**Suppl Table 1**). The purified  
378 product was used directly for the HiFi assembly into the porcine lambda expression vector.  
379 The expression vectors pNeoSec-SsFc-IgG1, pNeoSec-SsLC- $\kappa$  and pNeoSec-SsLC- $\lambda$  were  
380 provided by the Immunological Toolbox (The Pirbright Institute, UK). The vectors are derived  
381 from pNeoSec<sup>39</sup>. They encode the  $\mu$ -phosphatase secretion leader and were modified to  
382 include the antibody v region coding sequence cloning site containing the lacZ promoter and  
383 lacZ alpha peptide flanked by *KpnI* (5') and *PstI* (3'), and the porcine constant domains of  
384 IgG1, kappa or lambda), as previously described for expression of recombinant mouse  
385 antibodies<sup>40</sup>. The heavy and light chain PCR products were cloned in frame with seamless  
386 cloning using the NEBuilder® HiFi DNA Assembly Master Mix (NEB, UK) after linearizing the  
387 vectors with *KpnI* (5') and *PstI* (3'). The forward oligos had a 5'-20bp-overlap specific for the  
388 leader sequence encoded in the expression vector for HiFi assembly, whereas the reverse  
389 oligos all primed in the 5' end of the constant domains thereby also generating an overlap with  
390 the expression vectors suitable for seamless cloning.

391 The heavy and light chain assembly reactions from each single cell were transformed  
392 into NEB® 5-alpha Competent E. coli (High Efficiency) (NEB, UK). Between 2 to 6 colonies  
393 from each transformation were picked and inoculated in 3 ml LB + Kanamycin overnight  
394 aerobically at 37°C on an orbital shaker. Plasmid DNA was isolated with the QIAprep Spin  
395 Miniprep Kit (Qiagen, UK) and submitted to Sanger sequencing in-house (The Pirbright  
396 Institute, UK) to ensure an intact and full-length open reading frame before transfecting into  
397 HEK293 cells.

398

399 **Expression and purification of porcine antibodies.** HEK 293 cells (provided by Cell Culture  
400 Unit (CCU), The Pirbright Institute, UK) were seeded in T25 cm<sup>2</sup> tissue culture flasks in RPMI  
401 supplemented with HEPES, Glutamax and 10% FBS the day before transfection. Four  $\mu$ g of  
402 the heavy chain and 4  $\mu$ g of the corresponding light chain were mixed together in 375  $\mu$ l Opti-  
403 MEM (Gibco, ThermoFisher Scientific, UK) before addition of polyethylenimine (PEI MAX  
404 (Polysciences, Generon, UK) in a 3:1 ratio (PEI:DNA) in an equal volume of OptiMEM. Before  
405 transfection the medium was changed to RPMI supplemented with HEPES, Glutamax and 2%  
406 FBS. After 20 min the DNA:PEI complex was added dropwise onto the HEK 293 cells. After  
407 4h the transfection mix-containing medium was discarded, cells were washed once with sterile  
408 PBS and cultured for up to 4 days in RPMI supplemented with HEPES, Glutamax, Pen/Strep

409 and 5% IgG-depleted FBS (CCU, The Pirbright Institute or GIBCO, ultra-low IgG,  
410 ThermoFisher Scientific, UK).

411 After 5 days culture supernatant was harvested and cleared of cells and debris by  
412 centrifugation for 10 min at 500 x g. Thirty  $\mu$ l of Protein G (Protein G Sepharose Fast Flow,  
413 Merck, UK) slurry per sample was added in addition to 0.01% sodium azide and incubated on  
414 a roller overnight at 4°C. After incubation, samples were centrifuged at low speed, the  
415 supernatant was discarded and the Protein G beads were resuspended in sterile PBS and  
416 transferred into Spin columns (Micro Bio-Spin Chromatography Columns, Bio-Rad, UK). The  
417 beads were washed 4 x with sterile PBS before addition of 117  $\mu$ l Glycine pH 2.7 per sample  
418 and incubated for 5 min at room temperature. After that mAbs were eluted into sterile  
419 microcentrifuge tubes prefilled with 13  $\mu$ l of 1M Tris pH 8.0 and the buffer was exchanged to  
420 PBS/0.01% NaN<sub>3</sub> using Zeba Spin Desalting Columns (ThermoFisher Scientific, UK)  
421 according to the manufacturer's instructions and stored at 4°C until further analysis.

422

423 **B cell ELISpot.** B cell ELISpots were performed for the detection and enumeration of  
424 antibody-secreting cells in single cell suspensions prepared from different tissues and  
425 peripheral blood collected from two pigs 7 days after re-challenge with H1N1pdm09. ELISpot  
426 plates (Multi Screen-HA, Millipore, UK) were coated with 100  $\mu$ l per well of appropriate antigen  
427 or antibody diluted in carbonate/bicarbonate buffer for 2h at 37°C. To detect HA-specific spot-  
428 forming cells, plates were coated with 2.5  $\mu$ g per well of recombinant pHA from H1N1pdm09  
429 (A/England/195/2009) for the enumeration of total IgG-secreting cells with 1  $\mu$ g per well of  
430 anti-porcine IgG (mAb, MT421, Mabtech AB, Sweden) or with culture medium supplemented  
431 with 10% FBS (background). The coated plates were washed with PBS and blocked with 200  
432  $\mu$ l/well 4% milk in PBS. Freshly isolated or frozen porcine cell suspensions from different  
433 tissues were filtered through sterile 70  $\mu$ m cell strainers, plated at different cell densities in  
434 culture medium (RPMI, 10% FBS, HEPES, Sodium pyruvate, Glutamax and  
435 Penicillin/Streptomycin) on the ELISPOT plates and incubated for a minimum of 18 h at 37°C  
436 in a 5% CO<sub>2</sub> incubator. After incubation the cell suspension was removed, the plates washed  
437 once in ice-cold sterile H<sub>2</sub>O and thereafter with PBS/0.05 % Tween 20, before incubation with  
438 100  $\mu$ l per well of 0.5  $\mu$ g/ml biotinylated anti porcine IgG (mAb, MT424, Mabtech AB, Sweden)  
439 diluted in PBS/0.5 % FBS for two hours at room temperature. Plates were washed with  
440 PBS/0.05% Tween 20 and incubated with streptavidin – alkaline phosphatase conjugate  
441 (Strep-ALP, Mabtech AB, Sweden). After a final wash, the plates were incubated with AP  
442 Conjugate Substrate (Bio-Rad, UK) for a maximum of 30 min. The reaction was stopped by  
443 rinsing the plates in tap water and dried, before spots were counted.

444

445 **Serological assays.** ELISA was performed using the recombinant pHA containing a C-  
446 terminal thrombin cleavage site, a trimerization sequence, a hexahistidine tag and a BirA  
447 recognition sequence as previously described<sup>27</sup>. Hemagglutination inhibition (HAI) Ab titers  
448 were determined using 0.5% chicken red blood cells and H1N1pdm09 at a concentration of 4  
449 HA units/ml. Microneutralization (MN) was performed using standard procedures as described  
450 previously<sup>19,41</sup>.

451 The porcine mAbs were also tested for binding to MDCK- SIAT1 cells stably expressing  
452 pHA from H1N1pdm09 (A/England/195/2009), HA from A/Puerto Rico/8/1934 (PR8, H1N1)  
453 and H5 HA (A/Vietnam/1203/2004). Confluent cell monolayers in 96-well microtiter plates  
454 were washed with PBS and 50 ul of the antibody dilution in PBS/0.1% BSA was added for 1 h  
455 at room temperature. The plates were washed three times with PBS and 100 ul of horseradish  
456 peroxidase (HRP)-conjugated goat anti-pig Fc fragment secondary antibody (Bethyl  
457 Laboratories diluted in PBS, 0.1% BSA) was added for 1 h at room temperature. The plates  
458 were washed three times with PBS and developed with 100 µl/well TMB High Sensitivity  
459 substrate solution (Biolegend). After 5 to 10 min the reaction was stopped with 100 µl 1M  
460 sulfuric acid and the plates were read at 450 and 570 nm with the Cytation3 Imaging Reader  
461 (Biotek). The cut off value was defined as the average of all blank wells plus three times the  
462 standard deviation of the blank wells.

463  
464 **Selection of influenza variants with monoclonal antibodies.** Approximately  $0.5 \times 10^7$   
465 TCID<sub>50</sub> X-179A virus was mixed with antibody at 10 µg/ml in a total volume of 1 ml topped with  
466 virus growth medium (DMEM, 0.1%BSA, 10 mM HEPES, pH7.0, penicillin and streptomycin)  
467 and incubated at 37°C for 1 hour. The virus and antibody mixture were added to a monolayer  
468 of MDCK-SIAT1 cells in a 6-well plate. After 40 min, 2 ml of virus growth medium with 1.5  
469 µg/ml TPCK trypsin was added to the cells and incubated for 2 days at 37 °C with 5% CO<sub>2</sub>.  
470 Virus in the culture supernatant was harvested and tested in MDCK-SIAT1 cell infection  
471 assays. The HA and NA genes of the escape mutant virus populations were sequenced to  
472 assess the presence of encoded amino acid substitutions compared to the X-179A parent  
473 virus.

474  
475 **Competitive Binding Assay.** For epitope mapping, the inhibition of binding of known human  
476 mAbs 2-12C (head), T3-4B (head) and MEDI8852 (stem) at 1 µg/ml was performed with 10  
477 µg/ml porcine mAbs. The blocking of human mAb binding to pHA expressed on the surface of  
478 MDCK-SIAT1 cells was detected using second layer goat-anti-human IgG Alexa fluor 647  
479 (Invitrogen A-21445) for 2-12C or streptavidin-Alexa fluor 647 (Invitrogen S21374) for biotin-  
480 labelled T3-4B and MEDI8852. Fluorescence was measured using Clariostar (BMG Labtech)  
481 and the binding (%) of human mAb was calculated as  $(X - \text{Min}) / (\text{Max} - \text{Min}) * 100$  where  $X =$

482 Measurement of the competing mAb, Min = PBS background, Max = Binding of huMab in  
483 presence of non-binding mAb. Means and 95% confidence intervals for eight replicates are  
484 shown.

485

486 **Supplementary information**

487 **Supplementary Fig. 1:** Gating strategy for isolating single HA specific antibody secreting  
488 cells.

489 **Supplementary Table 1:** Primer sequences

490 **References:**

- 491 1 Anderson, T. K. *et al.* Swine Influenza A Viruses and the Tangled Relationship with  
492 Humans. *Cold Spring Harb Perspect Med*, doi:10.1101/cshperspect.a038737 (2020).
- 493 2 Sun, H. *et al.* Prevalent Eurasian avian-like H1N1 swine influenza virus with 2009  
494 pandemic viral genes facilitating human infection. *Proc Natl Acad Sci U S A*,  
495 doi:10.1073/pnas.1921186117 (2020).
- 496 3 Smith, G. J. *et al.* Origins and evolutionary genomics of the 2009 swine-origin H1N1  
497 influenza A epidemic. *Nature* **459**, 1122-1125, doi:10.1038/nature08182 (2009).
- 498 4 Kaplan, B. S. *et al.* Aerosol transmission from infected swine to ferrets of an H3N2  
499 virus collected from an agricultural fair and associated with human variant infections.  
500 *Journal of Virology*, JVI.01009-01020, doi:10.1128/jvi.01009-20 (2020).
- 501 5 Janke, B. H. Influenza A virus infections in swine: pathogenesis and diagnosis. *Vet*  
502 *Pathol* **51**, 410-426, doi:10.1177/0300985813513043 (2014).
- 503 6 Rajao, D. S. & Vincent, A. L. Swine as a model for influenza A virus infection and  
504 immunity. *ILAR J* **56**, 44-52, doi:10.1093/ilar/ilv002 (2015).
- 505 7 Tungatt, K. *et al.* Induction of influenza-specific local CD8 T-cells in the respiratory tract  
506 after aerosol delivery of vaccine antigen or virus in the Babraham inbred pig. *PLoS*  
507 *Pathog* **14**, e1007017, doi:10.1371/journal.ppat.1007017 (2018).
- 508 8 Gerhard, W., Yewdell, J., Frankel, M. E. & Webster, R. Antigenic structure of influenza  
509 virus haemagglutinin defined by hybridoma antibodies. *Nature* **290**, 713-717,  
510 doi:10.1038/290713a0 (1981).
- 511 9 Caton, A. J., Brownlee, G. G., Yewdell, J. W. & Gerhard, W. The antigenic structure of  
512 the influenza virus A/PR/8/34 hemagglutinin (H1 subtype). *Cell* **31**, 417-427,  
513 doi:10.1016/0092-8674(82)90135-0 (1982).
- 514 10 Corti, D. *et al.* A neutralizing antibody selected from plasma cells that binds to group 1  
515 and group 2 influenza A hemagglutinins. *Science* **333**, 850-856,  
516 doi:10.1126/science.1205669 (2011).
- 517 11 Ekiert, D. C. *et al.* Antibody recognition of a highly conserved influenza virus epitope.  
518 *Science* **324**, 246-251, doi:10.1126/science.1171491 (2009).
- 519 12 Dreyfus, C. *et al.* Highly conserved protective epitopes on influenza B viruses. *Science*  
520 **337**, 1343-1348, doi:10.1126/science.1222908 (2012).
- 521 13 Ekiert, D. C. *et al.* Cross-neutralization of influenza A viruses mediated by a single  
522 antibody loop. *Nature* **489**, 526-532, doi:10.1038/nature11414 (2012).
- 523 14 Bangaru, S. *et al.* A Site of Vulnerability on the Influenza Virus Hemagglutinin Head  
524 Domain Trimer Interface. *Cell* **177**, 1136-1152.e1118, doi:10.1016/j.cell.2019.04.011  
525 (2019).



- 526 15 Ali, S. O. *et al.* Evaluation of MEDI8852, an Anti-Influenza A Monoclonal Antibody, in  
527 Treating Acute Uncomplicated Influenza. *Antimicrob Agents Chemother* **62**,  
528 doi:10.1128/aac.00694-18 (2018).
- 529 16 Deng, R. *et al.* Pharmacokinetics of MHAA4549A, an Anti-Influenza A Monoclonal  
530 Antibody, in Healthy Subjects Challenged with Influenza A Virus in a Phase IIa  
531 Randomized Trial. *Clin Pharmacokinet* **57**, 367-377, doi:10.1007/s40262-017-0564-y  
532 (2018).
- 533 17 Hershberger, E. *et al.* Safety and efficacy of monoclonal antibody VIS410 in adults with  
534 uncomplicated influenza A infection: Results from a randomized, double-blind, phase-  
535 2, placebo-controlled study. *EBioMedicine* **40**, 574-582,  
536 doi:10.1016/j.ebiom.2018.12.051 (2019).
- 537 18 Sparrow, E., Friede, M., Sheikh, M., Torvaldsen, S. & Newall, A. T. Passive  
538 immunization for influenza through antibody therapies, a review of the pipeline,  
539 challenges and potential applications. *Vaccine* **34**, 5442-5448,  
540 doi:10.1016/j.vaccine.2016.08.057 (2016).
- 541 19 McNee, A. *et al.* Establishment of a Pig Influenza Challenge Model for Evaluation of  
542 Monoclonal Antibody Delivery Platforms. *J Immunol*, doi:10.4049/jimmunol.2000429  
543 (2020).
- 544 20 Morgan, S. B. *et al.* Therapeutic Administration of Broadly Neutralizing FI6 Antibody  
545 Reveals Lack of Interaction Between Human IgG1 and Pig Fc Receptors. *Front*  
546 *Immunol* **9**, 865, doi:10.3389/fimmu.2018.00865 (2018).
- 547 21 Schwartz, J. C., Lefranc, M. P. & Murtaugh, M. P. Organization, complexity and allelic  
548 diversity of the porcine (*Sus scrofa domestica*) immunoglobulin lambda locus.  
549 *Immunogenetics* **64**, 399-407, doi:10.1007/s00251-011-0594-9 (2012).
- 550 22 Schwartz, J. C., Lefranc, M. P. & Murtaugh, M. P. Evolution of the porcine (*Sus scrofa*  
551 *domestica*) immunoglobulin kappa locus through germline gene conversion.  
552 *Immunogenetics* **64**, 303-311, doi:10.1007/s00251-011-0589-6 (2012).
- 553 23 Guo, X., Schwartz, J. C. & Murtaugh, M. P. Genomic variation in the porcine  
554 immunoglobulin lambda variable region. *Immunogenetics* **68**, 285-293,  
555 doi:10.1007/s00251-016-0899-9 (2016).
- 556 24 Schwartz, J. C. & Murtaugh, M. P. Characterization of a polymorphic IGLV gene in pigs  
557 (*Sus scrofa*). *Immunogenetics* **66**, 507-511, doi:10.1007/s00251-014-0785-2 (2014).
- 558 25 Eguchi-Ogawa, T. *et al.* Antibody repertoire development in fetal and neonatal piglets.  
559 XI. The relationship of variable heavy chain gene usage and the genomic organization  
560 of the variable heavy chain locus. *J Immunol* **184**, 3734-3742,  
561 doi:10.4049/jimmunol.0903616 (2010).

- 562 26 Butler, J. E. & Wertz, N. The porcine antibody repertoire: variations on the textbook  
563 theme. *Front Immunol* **3**, 153, doi:10.3389/fimmu.2012.00153 (2012).
- 564 27 Huang, K. Y. *et al.* Focused antibody response to influenza linked to antigenic drift. *J*  
565 *Clin Invest* **125**, 2631-2645, doi:10.1172/jci81104 (2015).
- 566 28 Gauger, P. C. *et al.* Kinetics of lung lesion development and pro-inflammatory cytokine  
567 response in pigs with vaccine-associated enhanced respiratory disease induced by  
568 challenge with pandemic (2009) A/H1N1 influenza virus. *Vet Pathol* **49**, 900-912,  
569 doi:10.1177/0300985812439724 (2012).
- 570 29 Morgan, S. B. *et al.* Aerosol Delivery of a Candidate Universal Influenza Vaccine  
571 Reduces Viral Load in Pigs Challenged with Pandemic H1N1 Virus. *J Immunol* **196**,  
572 5014-5023, doi:10.4049/jimmunol.1502632 (2016).
- 573 30 Fu, F. *et al.* A spike-specific whole-porcine antibody isolated from a porcine B cell that  
574 neutralizes both genogroup 1 and 2 PEDV strains. *Vet Microbiol* **205**, 99-105,  
575 doi:10.1016/j.vetmic.2017.05.013 (2017).
- 576 31 Dong, H. *et al.* Development of Whole-Porcine Monoclonal Antibodies with Potent  
577 Neutralization Activity against Classical Swine Fever Virus from Single B Cells. *ACS*  
578 *Synth Biol* **8**, 989-1000, doi:10.1021/acssynbio.8b00365 (2019).
- 579 32 Li, K. *et al.* Generation of porcine monoclonal antibodies based on single cell  
580 technologies. *Vet Immunol Immunopathol* **215**, 109913,  
581 doi:10.1016/j.vetimm.2019.109913 (2019).
- 582 33 Berens, S. J., Wylie, D. E. & Lopez, O. J. Use of a single VH family and long CDR3s  
583 in the variable region of cattle Ig heavy chains. *Int Immunol* **9**, 189-199,  
584 doi:10.1093/intimm/9.1.189 (1997).
- 585 34 Haakenson, J. K. *et al.* A Broad Role for Cysteines in Bovine Antibody Diversity.  
586 *Immunohorizons* **3**, 478-487, doi:10.4049/immunohorizons.1900058 (2019).
- 587 35 [https://www.crick.ac.uk/sites/default/files/2018-](https://www.crick.ac.uk/sites/default/files/2018-07/crick_sep2015_vcm_report_to_post.pdf)  
588 [07/crick\\_sep2015\\_vcm\\_report\\_to\\_post.pdf](https://www.crick.ac.uk/sites/default/files/2018-07/crick_sep2015_vcm_report_to_post.pdf). The Crick Worldwide Influenza Centre  
589 Report for WHO. (2015).
- 590 36 Linderman, S. L. *et al.* Potential antigenic explanation for atypical H1N1 infections  
591 among middle-aged adults during the 2013-2014 influenza season. *Proc Natl Acad Sci*  
592 *U S A* **111**, 15798-15803, doi:10.1073/pnas.1409171111 (2014).
- 593 37 Holzer, B. *et al.* Comparison of Heterosubtypic Protection in Ferrets and Pigs Induced  
594 by a Single-Cycle Influenza Vaccine. *J Immunol* **200**, 4068-4077,  
595 doi:10.4049/jimmunol.1800142 (2018).
- 596 38 Halbur, P. G. *et al.* Comparison of the pathogenicity of two US porcine reproductive  
597 and respiratory syndrome virus isolates with that of the Lelystad virus. *Vet Pathol* **32**,  
598 648-660, doi:10.1177/030098589503200606 (1995).

- 599 39 Zhao, Y., Ren, J., Padilla-Parra, S., Fry, E. E. & Stuart, D. I. Lysosome sorting of  $\beta$ -  
600 glucocerebrosidase by LIMP-2 is targeted by the mannose 6-phosphate receptor. *Nat*  
601 *Commun* **5**, 4321, doi:10.1038/ncomms5321 (2014).
- 602 40 Nettleship, J. E. *et al.* A pipeline for the production of antibody fragments for structural  
603 studies using transient expression in HEK 293T cells. *Protein Expr Purif* **62**, 83-89,  
604 doi:10.1016/j.pep.2008.06.017 (2008).
- 605 41 Powell, T. J., Silk, J. D., Sharps, J., Fodor, E. & Townsend, A. R. Pseudotyped  
606 influenza A virus as a vaccine for the induction of heterotypic immunity. *J Virol* **86**,  
607 13397-13406, doi:10.1128/JVI.01820-12 (2012).

608 **Acknowledgements:** We are grateful to the animal staff for providing excellent animal care  
609 and to the immunological toolbox for providing the porcine heavy and light chain Ig  
610 constructs. We thank Giacomo Gorini, Carolyn Nielsen and Simon Draper from the Jenner  
611 Institute, University of Oxford for helpful discussions. We thanks APHA for providing the  
612 swine A/Sw/Eng/1353/09 influenza virus strain (DEFRA surveillance programme SW3401).

613

614 **Funding:** This work was supported by Bill & Melinda Gates Foundation grant OPP1201470  
615 and OPP1215550 (Pirbright Livestock Antibody Hub); UKRI Biotechnology and Biological  
616 Sciences Research Council (BBSRC) grants BBS/E/I/00007031, BBS/E/I/00007038 and  
617 BBS/E/I/00007039. P.R. and A.R.T. were funded by the Chinese Academy of Medical  
618 Sciences (CAMS) Innovation Fund for Medical Sciences (CIFMS), China Grant 2018-I2M-2-  
619 002, the Townsend-Jeantet Prize Charitable Trust (charity number 1011770) and the Medical  
620 Research Council (MRC) Grant MR/P021336/1.

621

622 **Author contributions:** ET, BH, AM, PR, ART, JH conceived, designed and coordinated the  
623 study. ET, AM, BH, BP, BC, MP, EB, TM, KM, MBDP, SPG, PB, RMR, JCS, ART, WM  
624 designed and performed experiments, processed samples and analyzed the data. JWM and  
625 RSD performed sequencing analysis. FJS carried out postmortem and pathological analysis.  
626 ET, PR, AM, BH, PB, ART wrote the manuscript. All authors read and commented on the  
627 manuscript.

628

629 **Competing interests:** The authors have no financial conflicts of interest.

630

631 **Table 1. Characteristics of porcine anti-influenza mAbs.**

| Clone | ELISA pHA | MN pH1N1 (ng/ml) | HAI (ng/ml) | Light chain V family | CDRH3 length (aa) | Cysteines in CDRH3 |
|-------|-----------|------------------|-------------|----------------------|-------------------|--------------------|
| pb1   | Yes       | 5                | 312.5       | IGKV2                | 12                |                    |
| pb2   | Yes       | No               | No          | IGLV8                | 19                |                    |
| pb3   | Yes       | 20,480           | 50,000      | IGKV2                | 17                |                    |
| pb4   | Yes       | No               | No          | IGLV8                | 12                |                    |
| pb5   | Yes       | No               | No          | IGKV1                | 15                |                    |
| pb6   | No        | No               | No          | IGLV3                | 16                | 2                  |
| pb7   | No        | No               | No          | IGLV3                | 19                | 2                  |
| pb8   | Yes       | No               | No          | GKV2                 | 16                |                    |
| pb9   | Yes       | No               | No          | IGLV8                | 20                | 2                  |
| pb10  | Yes       | 5,120            | 12,500      | IGLV8                | 22                | 2                  |
| pb11  | Yes       | 80               | 625         | IGLV8                | 10                |                    |
| pb12  | Yes       | No               | No          | IGLV8                | 20                | 2                  |
| pb13  | Yes       | 10,240           | 25,000      | IGLV8                | 8                 |                    |
| pb14  | Yes       | 5                | 156.25      | IGLV8                | 21                | 2                  |
| pb15  | Yes       | 20               | 312.5       | IGLV8                | 21                |                    |
| pb16  | Yes       | 20               | 312.5       | IGLV8                | 17                | 2                  |
| pb17  | Yes       | No               | No          | IGLV8                | 20                | 2                  |
| pb18  | Yes       | 10               | 156.25      | IGLV8                | 18                | 2                  |
| pb19  | Yes       | 5,120            | 25,000      | IGLV8                | 24                | 2                  |
| pb20  | Yes       | 10               | 156.25      | IGLV8                | 18                | 2                  |
| pb21  | Yes       | No               | No          | IGLV8                | 19                |                    |
| pb22  | Yes       | No               | No          | IGKV1                | 8                 |                    |
| pb23  | Yes       | No               | No          | IGKV1                | 14                |                    |
| pb24  | Yes       | 20               | 625         | IGKV2                | 12                |                    |
| pb25  | Yes       | No               | No          | IGKV1                | 13                |                    |
| pb26  | No        | No               | No          | IGKV2                | 19                |                    |
| pb27  | Yes       | 10               | 156.25      | IGKV2                | 13                |                    |
| pb28  | Yes       | No               | No          | IGKV2                | 19                |                    |
| pb29  | Yes       | 40,960           | 100,000     | IGKV1                | 20                |                    |
| pb31  | Yes       | No               | No          | IGKV1                | 17                |                    |
| pb32  | No        | No               | No          | IGKV2                | 12                |                    |
| pb33  | Yes       | No               | No          | IGKV2                | 15                |                    |
| pb34  | Yes       | No               | No          | IGKV1                | 15                |                    |
| pb35  | Yes       | No               | No          | IGKV2                | 20                |                    |
| pb36  | Yes       | No               | No          | IGKV2                | 15                |                    |
| pb37  | Yes       | No               | No          | IGKV1                | 12                |                    |
| pb38  | Yes       | No               | No          | IGKV2                | 13                |                    |
| pb39  | Yes       | 5,120            | 12,500      | IGKV2                | 18                |                    |
| pb40  | Yes       | No               | No          | IGKV2                | 14                |                    |
| pb41  | Yes       | No               | No          | IGKV1                | 15                | 2                  |
| pb42  | No        | No               | No          | IGKV1                | 15                |                    |
| pb43  | Yes       | 10,240           | 50,000      | IGKV2                | 13                |                    |
| pb44  | Yes       | No               | No          | IGLV8                | 8                 |                    |
| pb45  | Yes       | 5,120            | 6,250       | IGLV8                | 21                | 2                  |
| pb46  | Yes       | 10               | 312.5       | IGKV2                | 19                |                    |

632

633 **Table 2. Amino acid substitutions selected by antibodies in the HA of H1N1pdm09**  
634 **virus.**

| Mab  | HA amino acid substitutions |         |         |         |         |         |         |
|------|-----------------------------|---------|---------|---------|---------|---------|---------|
|      | K130                        | G155    | K160    | G170    | A186    | D187    | Q223    |
| pb1  |                             | E       |         |         |         | E       | R       |
| pb15 | K20/E80                     |         |         | G80/R20 |         |         |         |
| pb18 |                             |         | K45/E55 |         | A35/D65 |         |         |
| pb20 |                             |         |         |         | D       |         |         |
| pb24 |                             | E       |         |         |         | E       | R       |
| pb27 | K45/E55                     | G70/E30 |         |         |         | D70/E30 | Q70/R30 |

635

636 Mutant viruses selected with pb1, pb20 and pb24 encoded HA homogenous amino acid  
637 substitutions. Those selected with pb15, pb18 and pb27 encoded polymorphisms at two or  
638 more amino acid positions; ratios of parent/mutant amino acids at each position are  
639 indicated.

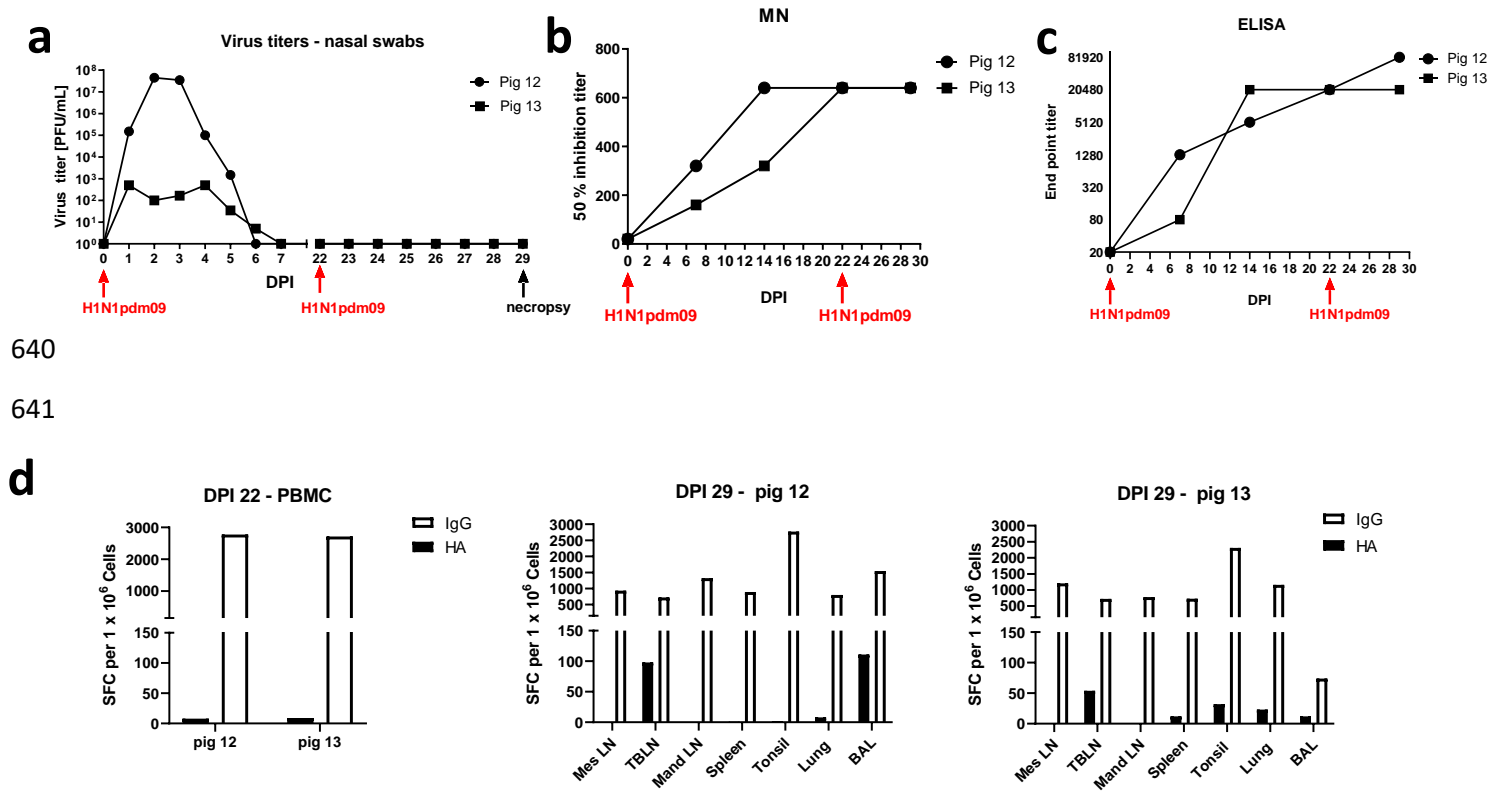

640

641

d

642

643 **Figure 1. Responses in H1N1pdm09 infected pigs used for mAb generation.** Two pigs  
 644 (pig12 and pig13) were challenged intranasally with H1N1pdm09 and 22 days later re-  
 645 challenged with the same virus. Virus loads in nasal swabs, taken daily after challenge, were  
 646 assessed by plaque assay (a), serum neutralizing activity of H1N1pdm09 by  
 647 microneutralization assay (b) and pHA binding was quantified by ELISA (c). pHA specific and  
 648 porcine IgG producing spot forming cells (SFC) were enumerated in blood at 22 DPI and in  
 649 mesenteric (Mes LN), tracheobronchial (TBLN), mandibular (Mand LN), spleen, tonsils, lung  
 650 and broncho-alveolar lavage (BAL) at 29 DPI (7 days post re-challenge) (d).

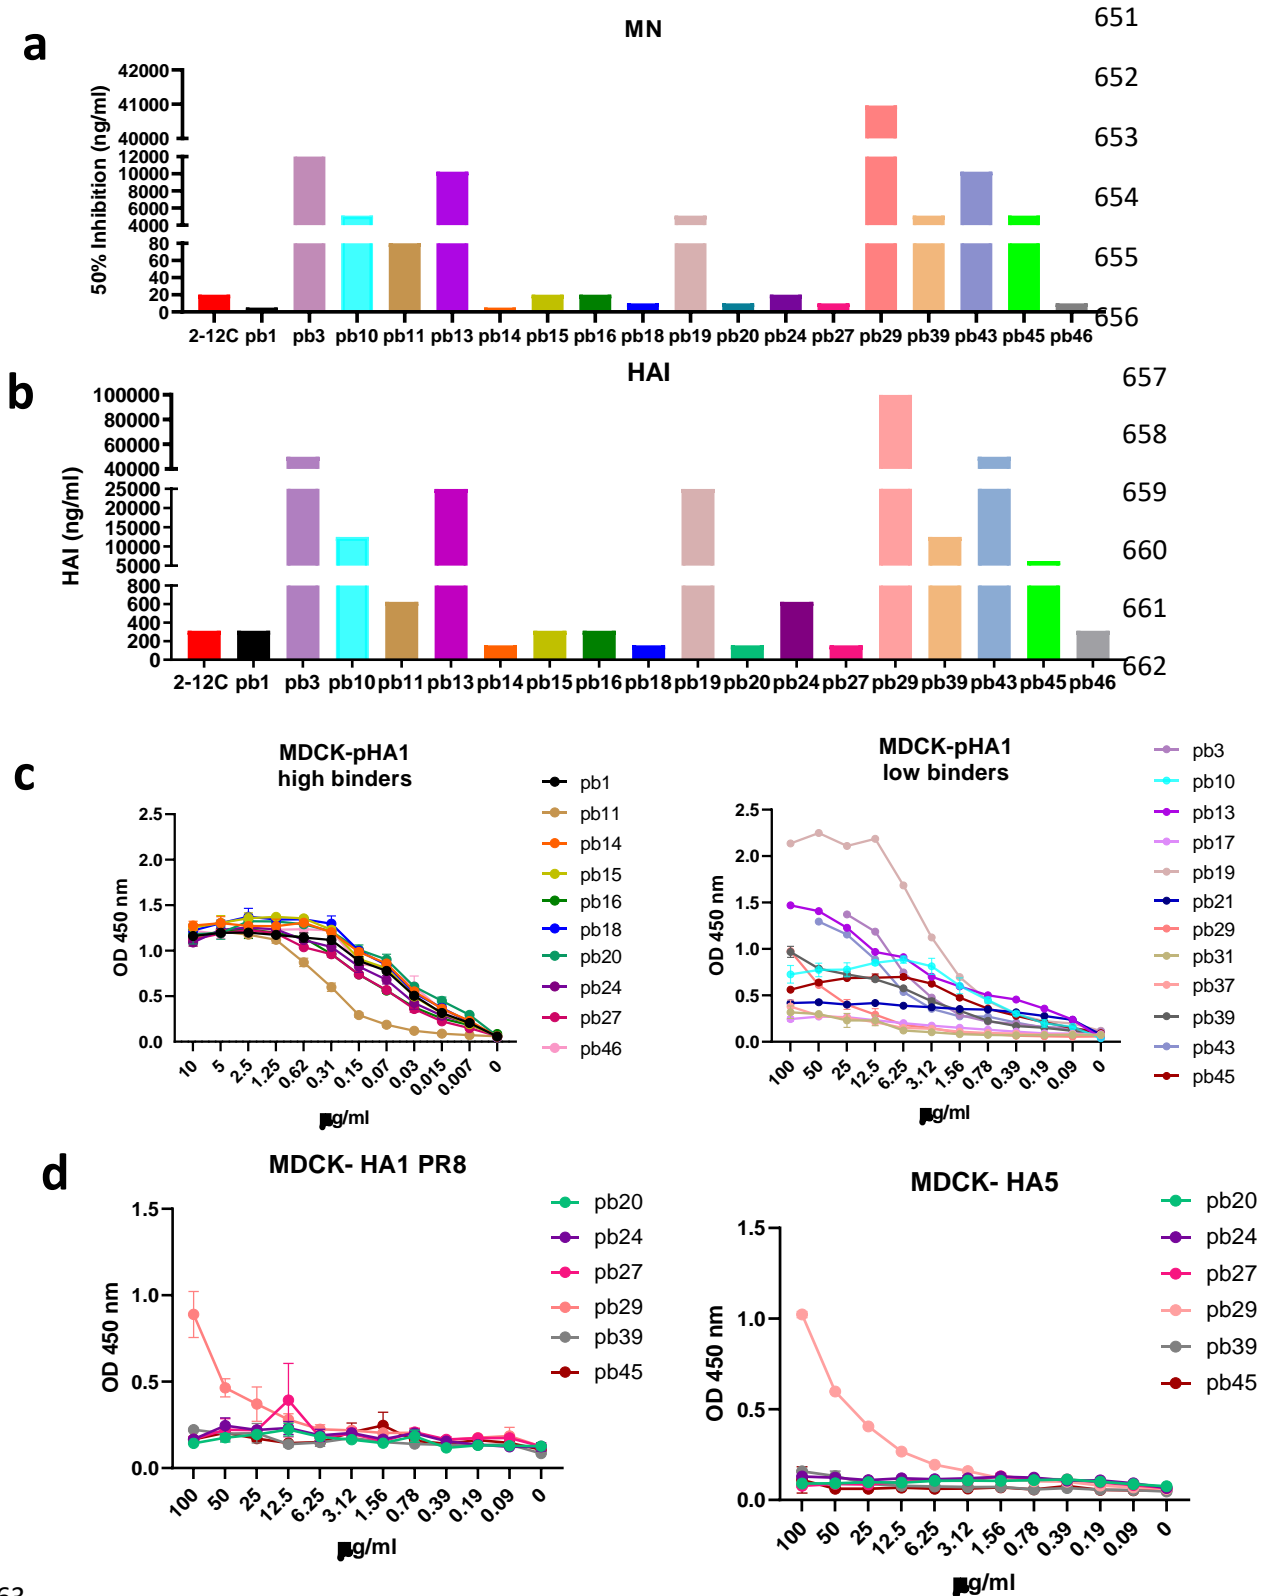

663

664 **Figure 2. Neutralizing and binding activity of porcine mAbs.** Concentrations of individual  
 665 mAbs giving 50% neutralization (a) and hemagglutination inhibition (HAI) (b). Titration of  
 666 binding of porcine mAbs to MDCK-pHA (c) and MDCK HA PR8 and MDCK- HA 5 expressing  
 667 cells (d).



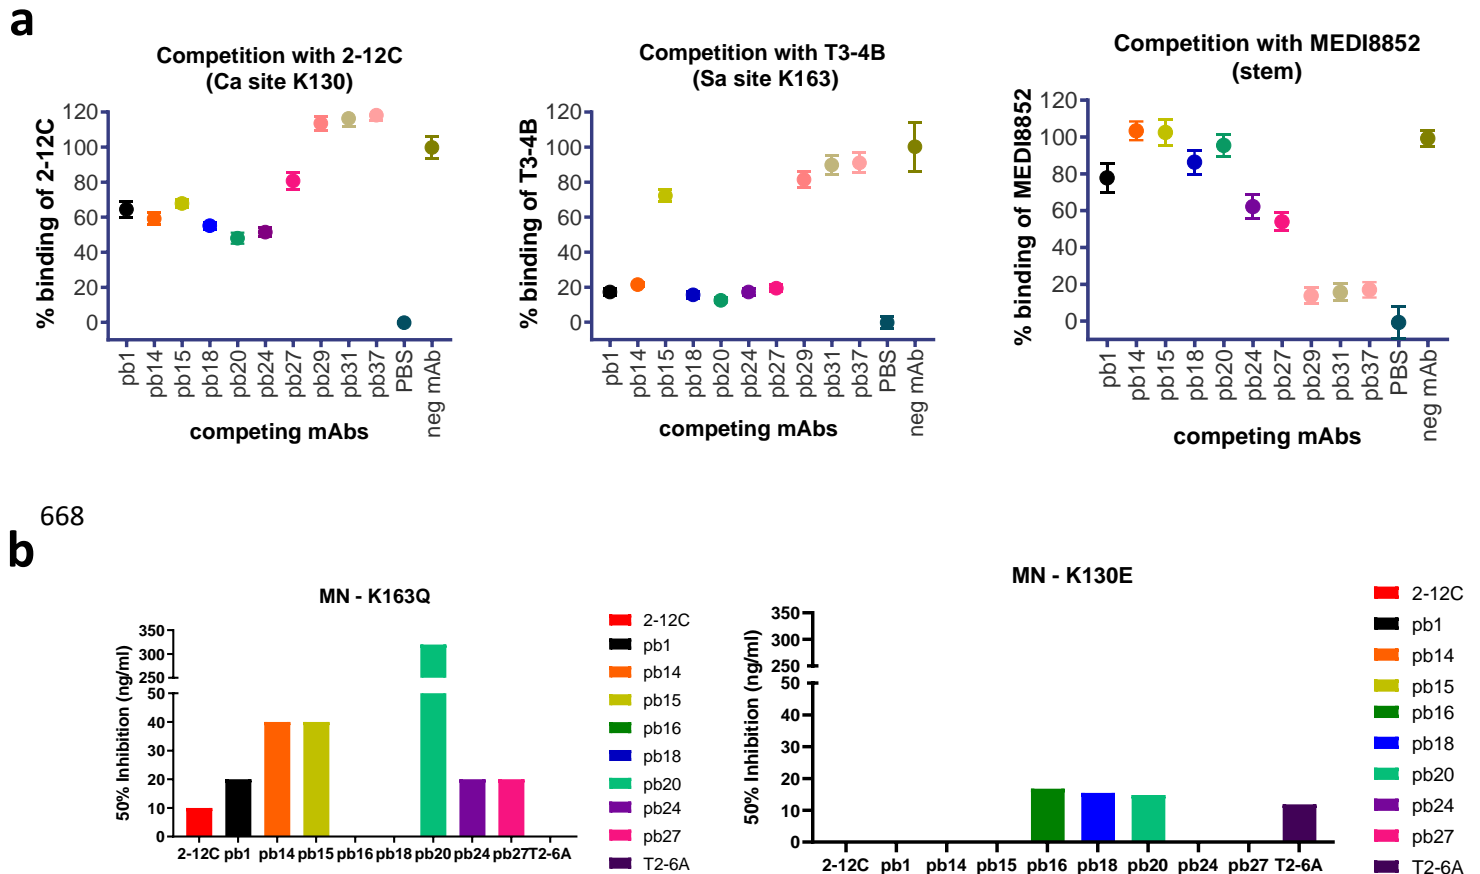

669

670

671 **Figure 3. Inhibition of binding of human mAbs and neutralization of mutant viruses by**  
 672 **porcine mAbs.** Inhibition of binding of human 2-12C, T3-4B and MEDI885 mAbs to MDCK-  
 673 pHA expressing cells by porcine mAbs. Means and 95% confidence intervals for 8 replicates  
 674 are shown (a). Percent competition was calculated as  $(X - \text{Max}) / (\text{Max} - \text{Min}) * 100$ , where X=  
 675 Measurement value, Max = Negative mAb (EBOV Mab), Min = PBS . Concentrations of mAbs  
 676 giving 50% neutralization of viruses with HA K163Q and K130E substitutions (b). Absence of  
 677 bar indicates that a mAb is non-neutralizing.

678

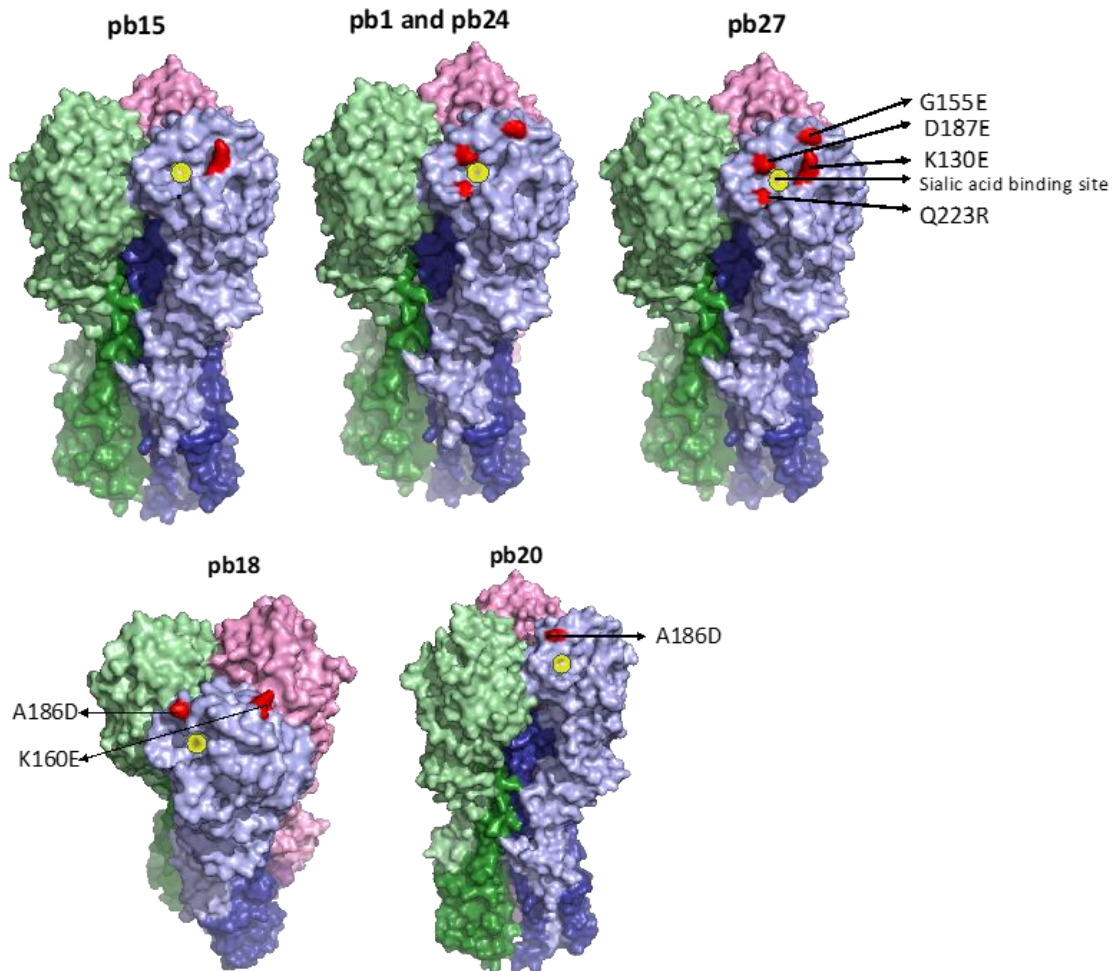

679 **Figure 4. Mapping of the amino acid substitutions selected by mAbs.** Substitutions  
680 selected by top panel mAbs are - Ca sites (K130E, Q223R) Sa site (G155E) and Sb site  
681 (D187E), and on the bottom panel are Sa site (K160E) and Sb site (A186D). Substitutions  
682 were mapped with Pymol version 1.7 onto PDB:4M4Y.

683

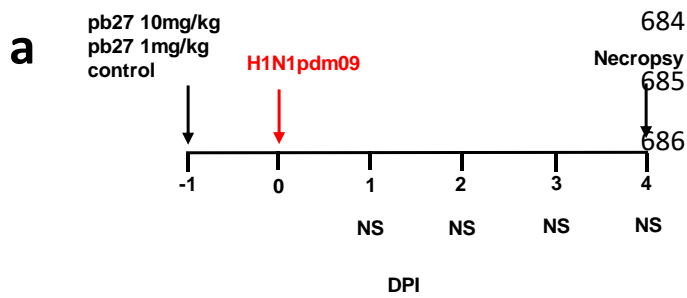

687

688

689

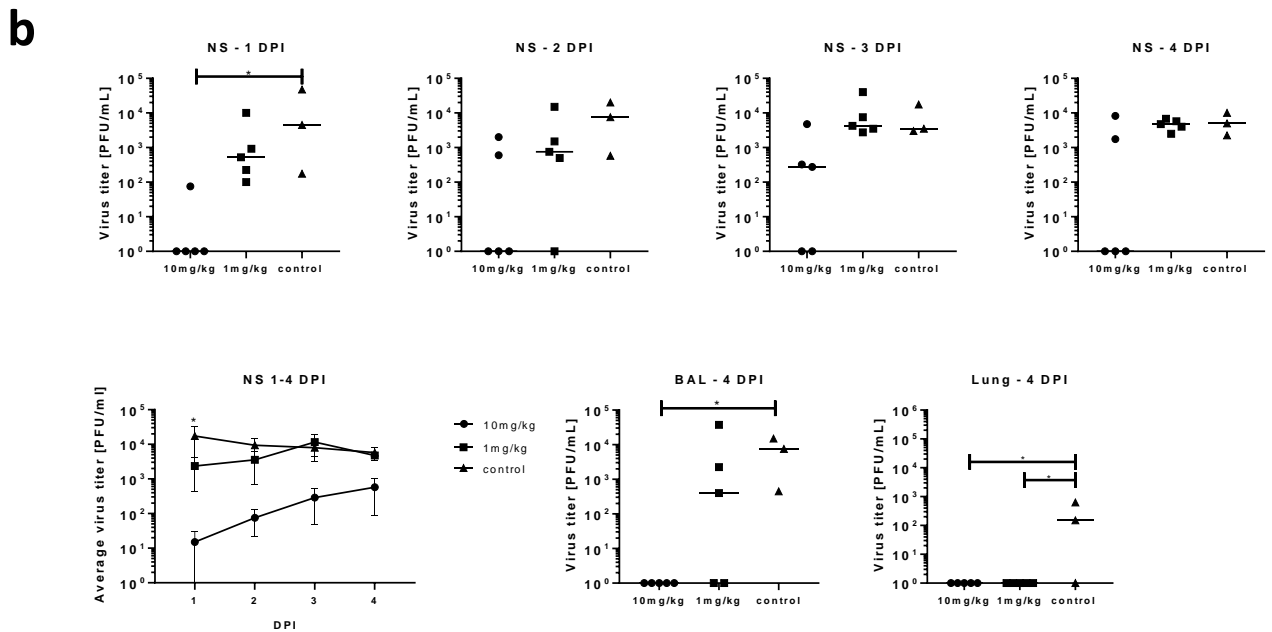

690

691

692

693

694

695

696

697

698

699

700

**Figure 5. *In vivo* efficacy of pb27.** pb27 was administered intravenously to pigs at 10 mg/kg and 1mg/kg, which were infected with H1N1pdm09 virus 24 hours later. Only three control animals were available. Nasal swabs (NS) were taken at 1, 2, 3 and 4 days post-infection (DPI) and pigs euthanized at 4 DPI (a). Virus titers in NS, accessory lung lobe (Lung) and BAL at 4DPI were determined by plaque assay (b). Each data point represents an individual pig within the indicated group and bars show the mean. Virus shedding in NS is also represented as the mean of the 5 pigs on each day and significance versus diluent control indicated by asterisks. Virus titers were analysed using one-way non-parametric ANOVA, the Kruskal-Wallis test. Asterisks denote significant differences \* $p < 0.05$  versus control.

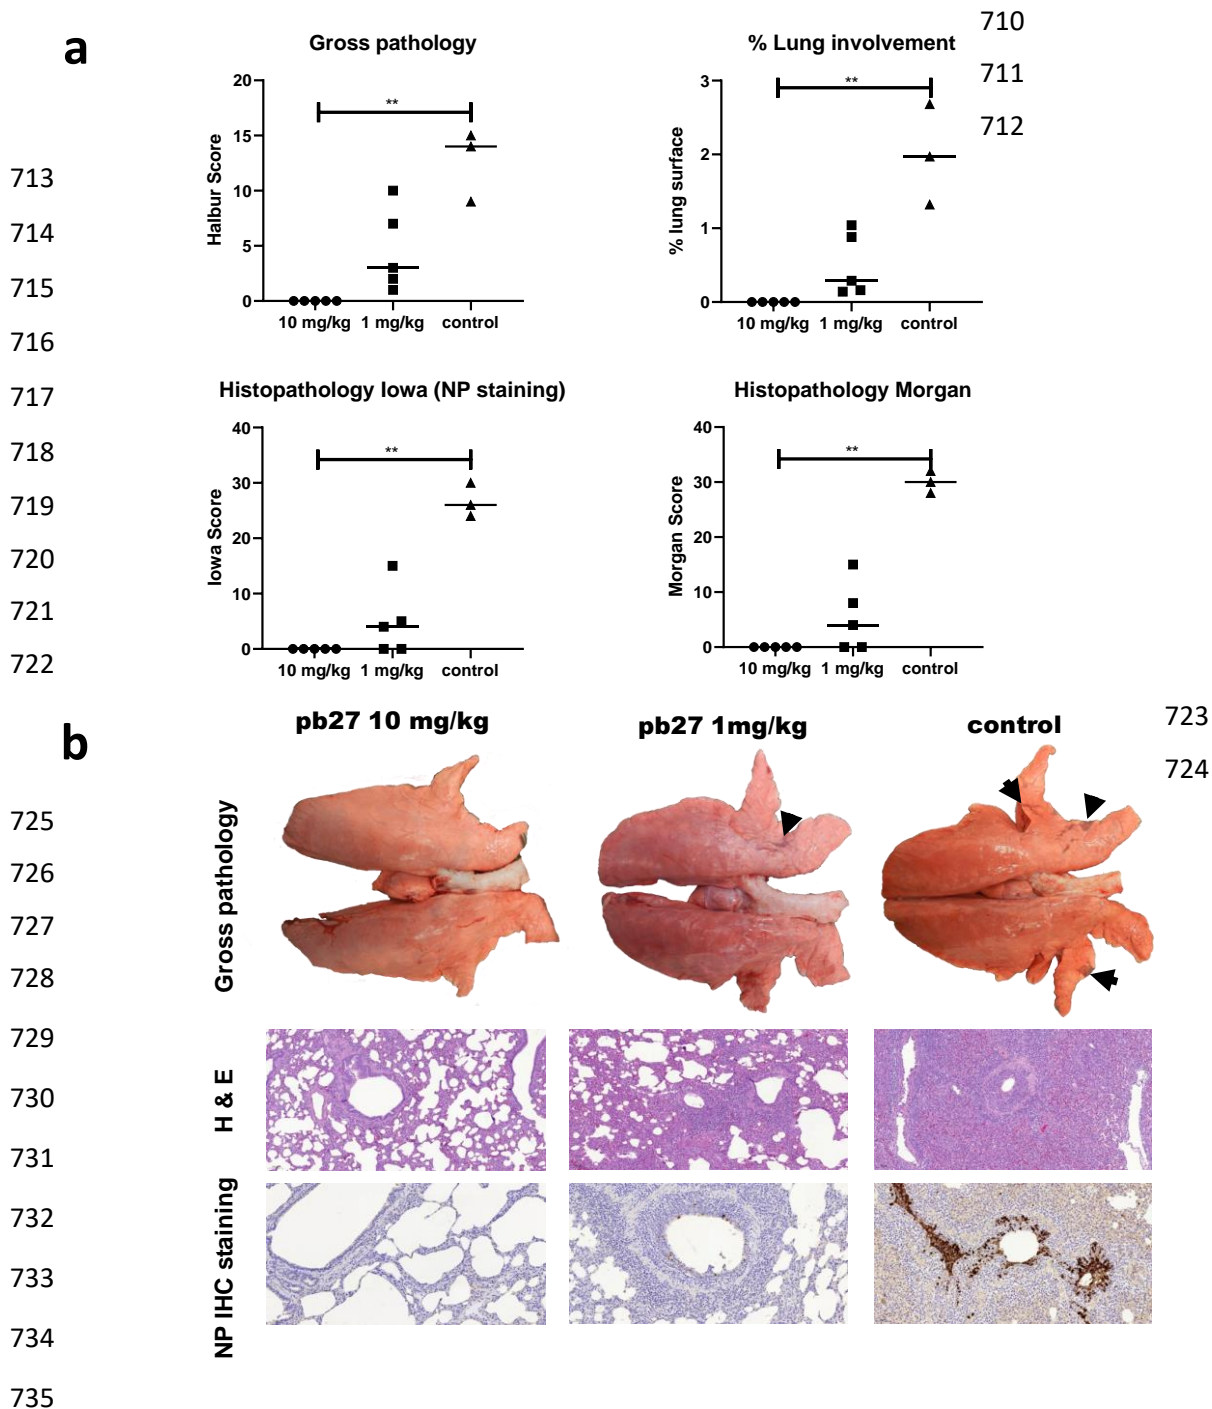

**Figure 6. Lung pathology.** pb27 was administered intravenously to pigs at 10 mg/kg and 1 mg/kg and animals were infected with H1N1pdm09 virus 24 hours later. The animals were euthanized at 4 DPI and lungs scored for appearance of gross and histopathological lesions. The gross and histopathological scores for each individual in a group and the group means are shown (a), including the percentage of lung surface with lesions, the lesion scores and the histopathological scores as previously described (“Iowa” includes the NP staining)<sup>28,29,38</sup>. Representative gross pathology (arrows showing typical areas of focal pneumonia), histopathology (H&E staining; 100x) and immunohistochemical NP staining (200x) for each group are shown (b). Pathology scores were analysed using one-way non-parametric ANOVA with the Kruskal-Wallis test. Asterisks denote significant differences \*p<0.05, \*\*p<0.01, \*\*\*p<0.001 versus control.

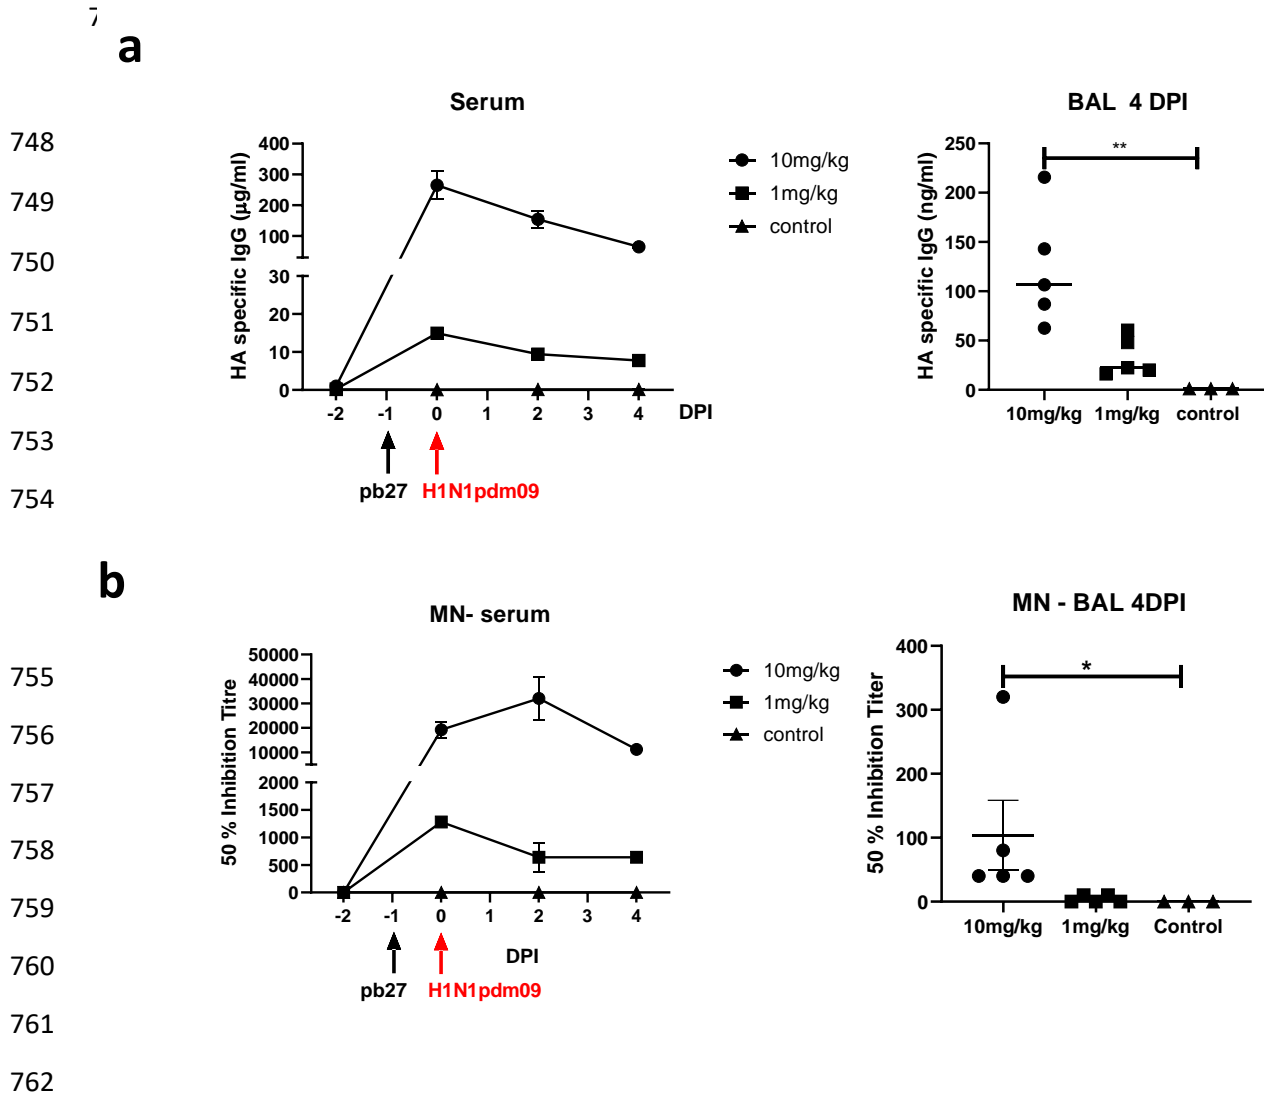

763 **Figure 7. Concentration and neutralizing titer of pb27 in serum and BAL.** H1 HA specific  
764 IgG in serum, BAL at 4 DPI at the indicated DPI (a). 50% neutralization titers against  
765 H1N1pdm09 in the serum and BAL at 4 DPI (b). Symbols represent individual pigs within the  
766 indicated group and lines the mean. Data were analysed using one-way non-parametric  
767 ANOVA with the Kruskal-Wallis test. Asterisks denote significant differences \* $p < 0.05$  and  
768 \*\* $p < 0.01$  versus control.
